# Supplementary material for: Helminth-Based Product and the Microbiome of Mice with Lupus
Source: PubMed Central journal article supplement (PMC6381224; doi:10.1128/msystems.00160-18), 2019-02-19
Supplement: mSystems.00160-18-sf001.pdf [file mSystems.00160-18-sf001.pdf]

Sup. Figure 1.

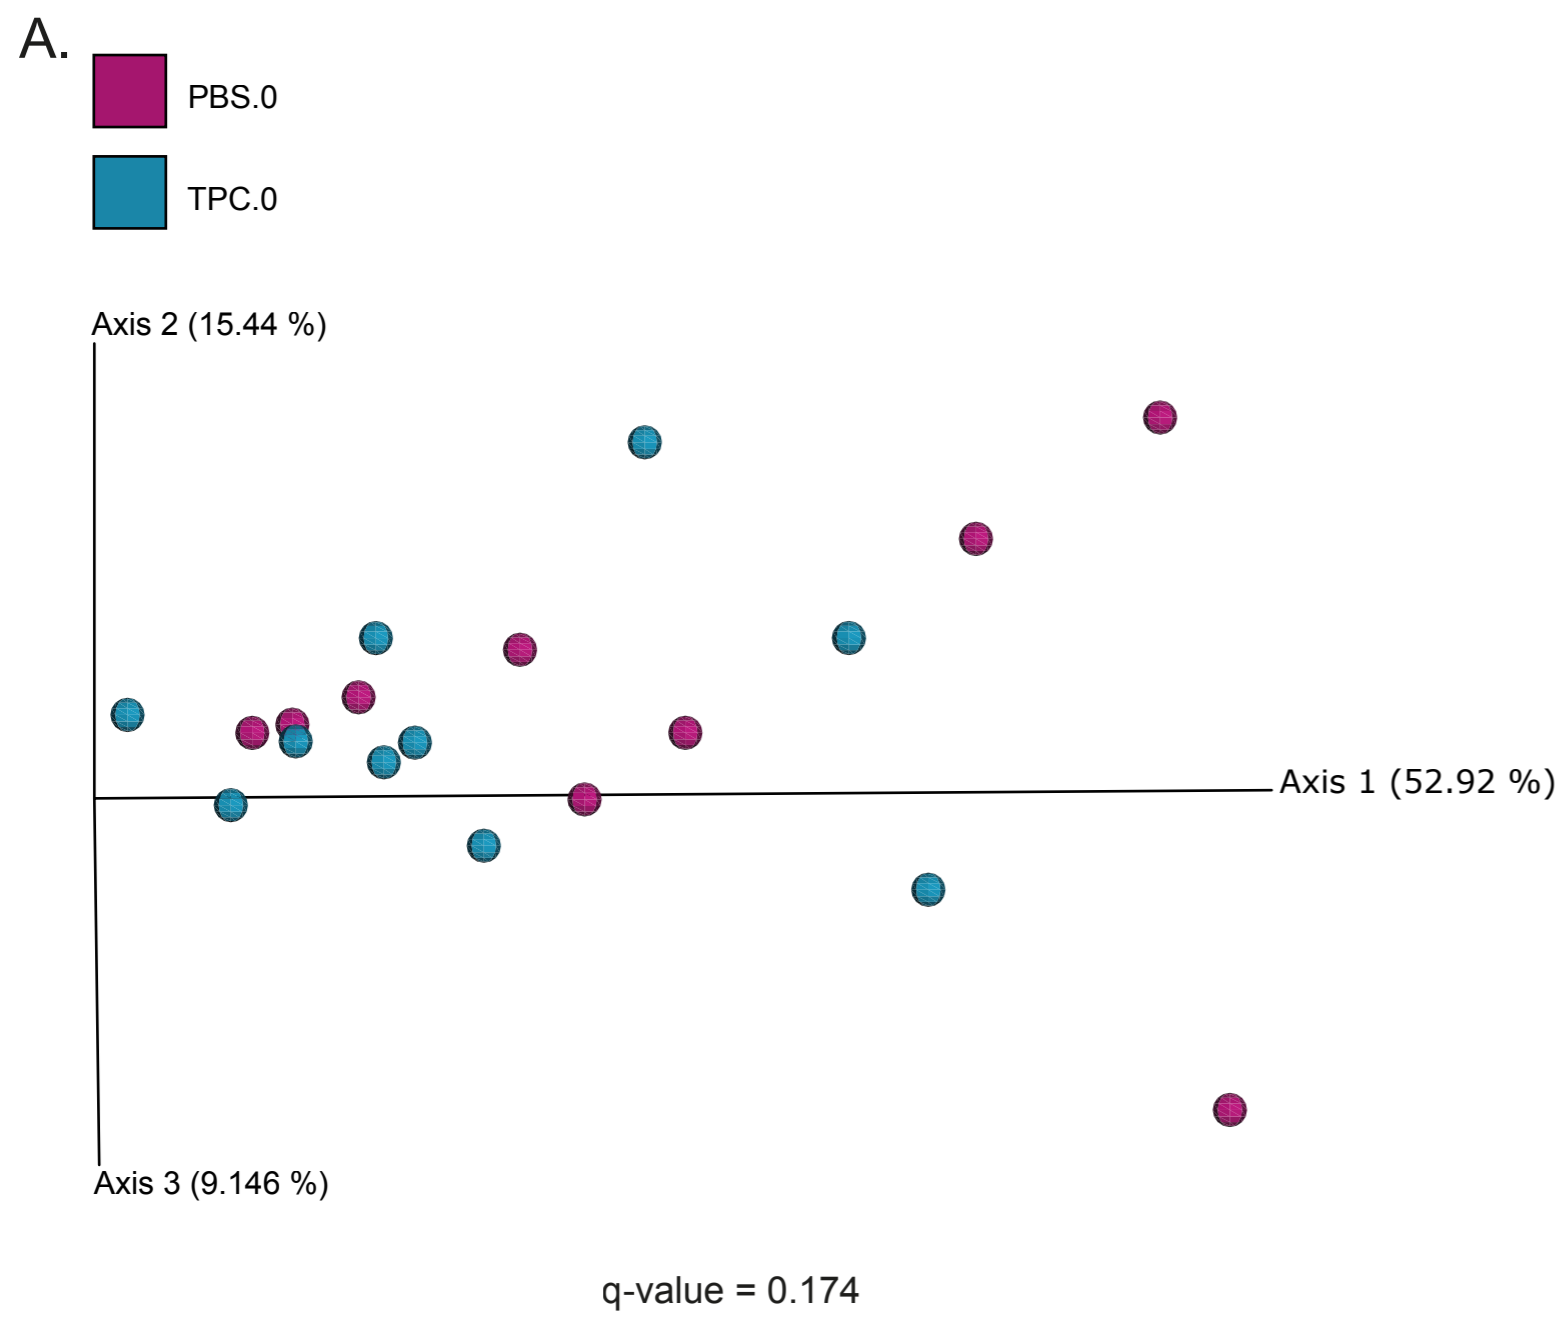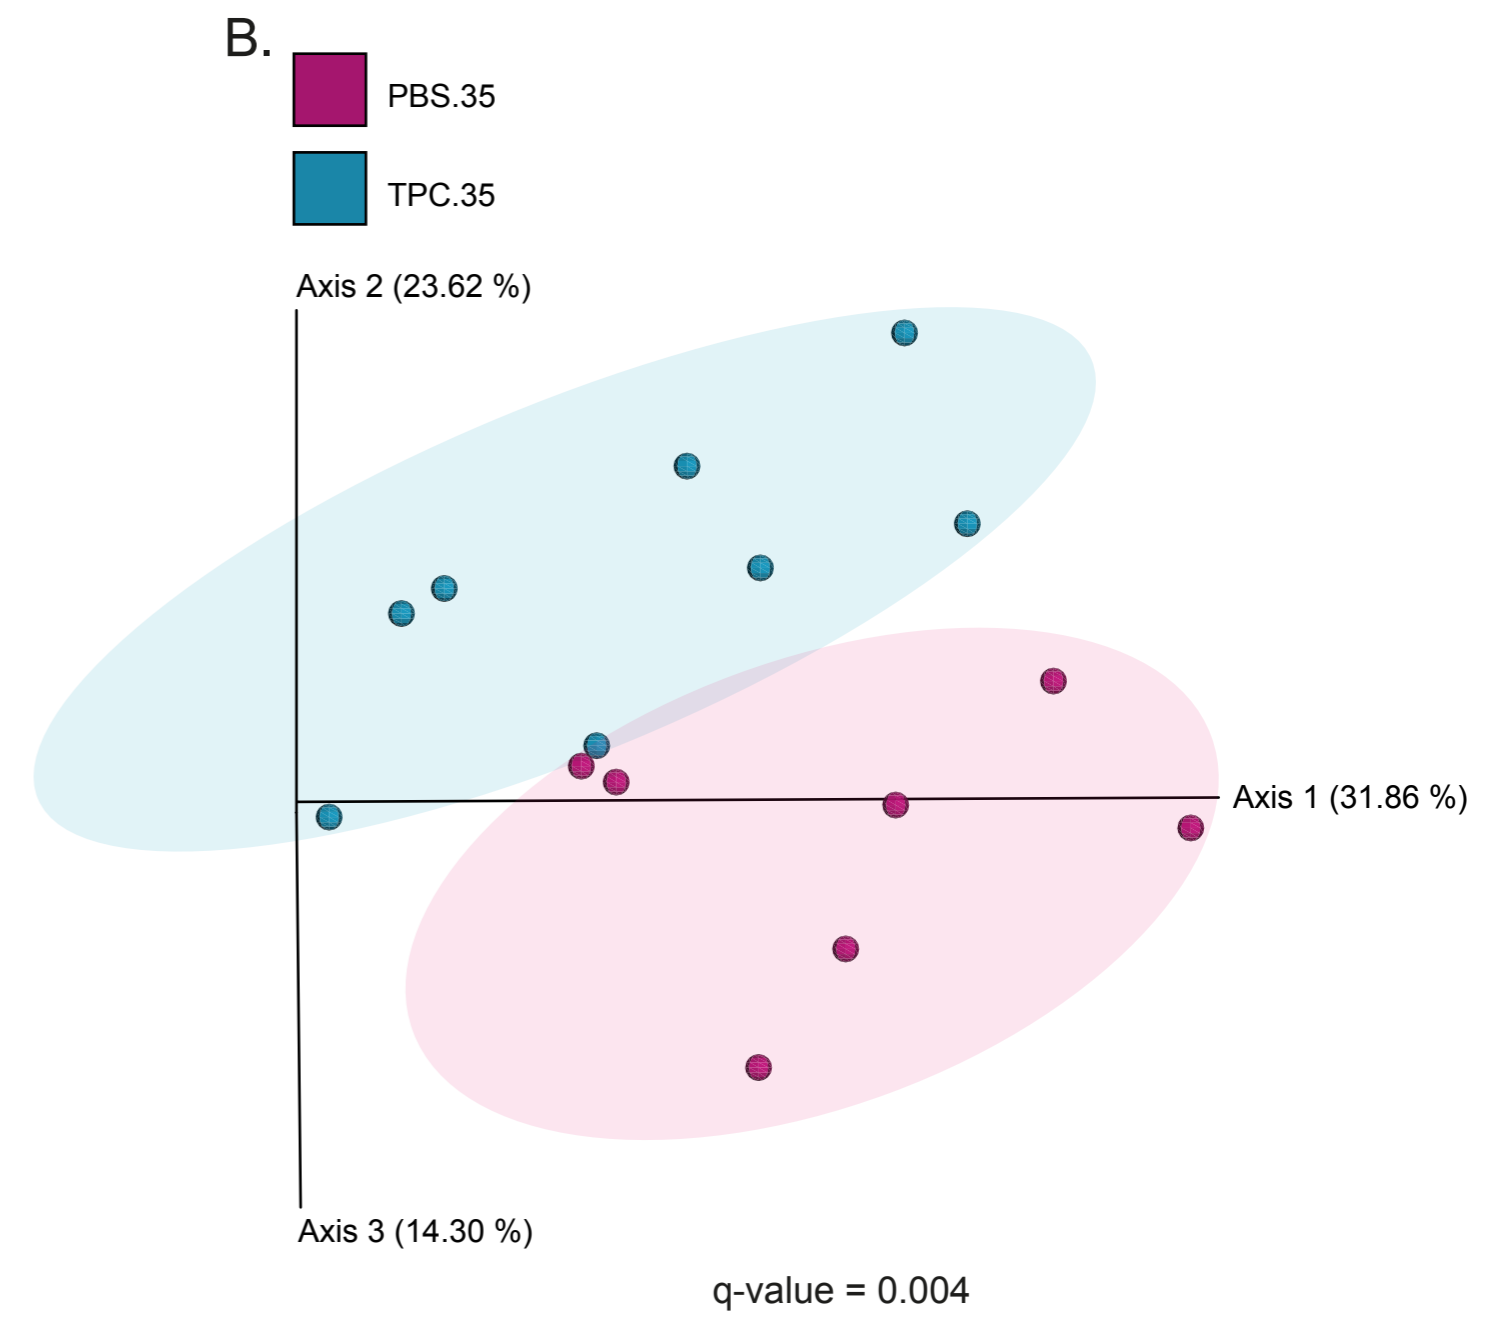

Fig.4
